# Supplementary material for: New insights into size-controlled reproducible synthesis of anisotropic Fe3O4 nanoparticles: the importance of the reaction environment
Source: Royal Society of Chemistry journal article supplement (doi:10.1039/d0ma00275e), 2020-01-01
Supplement: d0ma00275e1.pdf [file d0ma00275e1.pdf]

## Supporting Information

### New insights into size-controlled reproducible synthesis of anisotropic Fe<sub>3</sub>O<sub>4</sub> nanoparticles: The importance of reaction environment

Gurvinder Singh,<sup>\*a</sup> Vladimir S. Myasnichenko,<sup>b</sup> Wilhelm R. Glomm<sup>c</sup>

<sup>a</sup>*School of Biomedical Engineering, University of Sydney, Sydney, NSW 2008, Australia.*

Email: [gurvinder.singh@sydney.edu.au](mailto:gurvinder.singh@sydney.edu.au)

<sup>b</sup>*Tver State University, Sadovyi per., 35, 170002, Tver, Russia.*

<sup>c</sup>*Department of Biotechnology and Nanomedicine, SINTEF Industry, 7465, Norway.*

#### Experimental method

**Materials:** Iron acetylacetonate (Fe(acac)<sub>3</sub>) and oleic acid (OA, technical 80%) were purchased from Alfa Aesar. Benzyl ether (BE, 98%) was used as received from Sigma Aldrich.

**Synthesis of different shaped Fe<sub>3</sub>O<sub>4</sub> NPs :** 0.706 g (2 mmol) of Fe(acac)<sub>3</sub>, and 1.26 mL (3.6 mmol) of OA were added to 20 mL benzyl ether in 50 mL double neck round bottom flask. The reaction mixture was degassed at room temperature for 90 min under mild stirring on the standard schlenk line under different pressures in order to tune the amount of residual oxygen. After degassing, the solution was flushed with argon (Ar). The temperature of the reaction mixture was increased to 290°C at different heating rate under Ar atmosphere, and kept at this temperature for 30 min. During the reaction, the color of the solution was changed from dark orange to dark-brown indicating the formation of Fe<sub>3</sub>O<sub>4</sub> NPs. After cooling down the solution to room temperature, 40 mL toluene was added, and the resultant solution was centrifuged at 2000 rpm for 5 min. The supernatant was discarded, and the precipitate was redispersed in 10 mL n-hexane and 20 mL acetone followed by centrifugation at 4000 rpm for 5 min. The collected Fe<sub>3</sub>O<sub>4</sub> NPs were again washed with hexane and acetone. The precipitate was dried, and redisperse in 10 mL toluene in the presence of 50 µL OA.

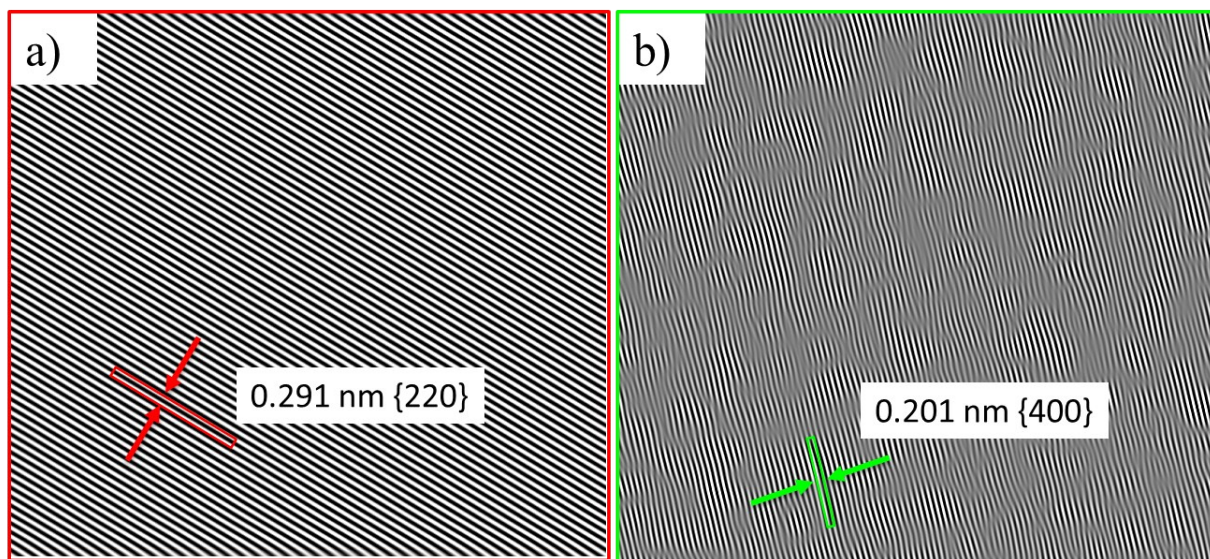

**Fig. S1** Determination of lattice spacing based on inverse FFT image produced from the reflections marked by red and green circles in Fig. 1.

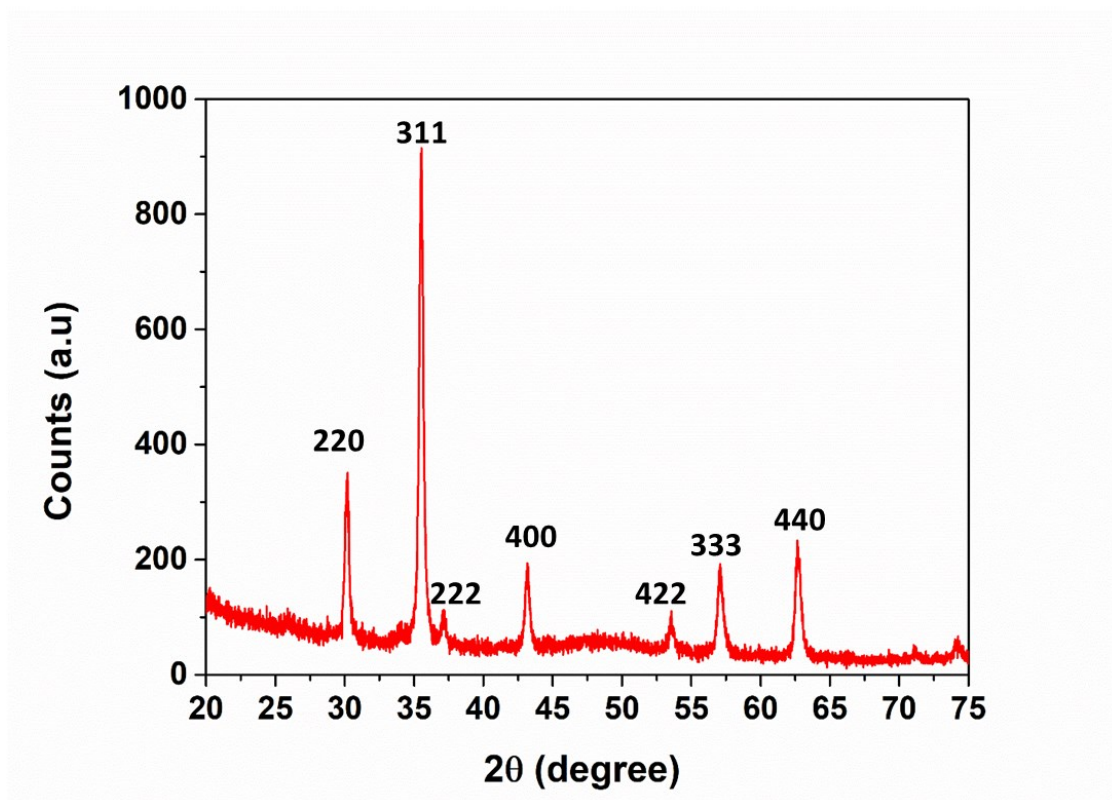

**Fig. S2** X-ray diffraction (XRD) pattern of Fe<sub>3</sub>O<sub>4</sub> nanocubes.

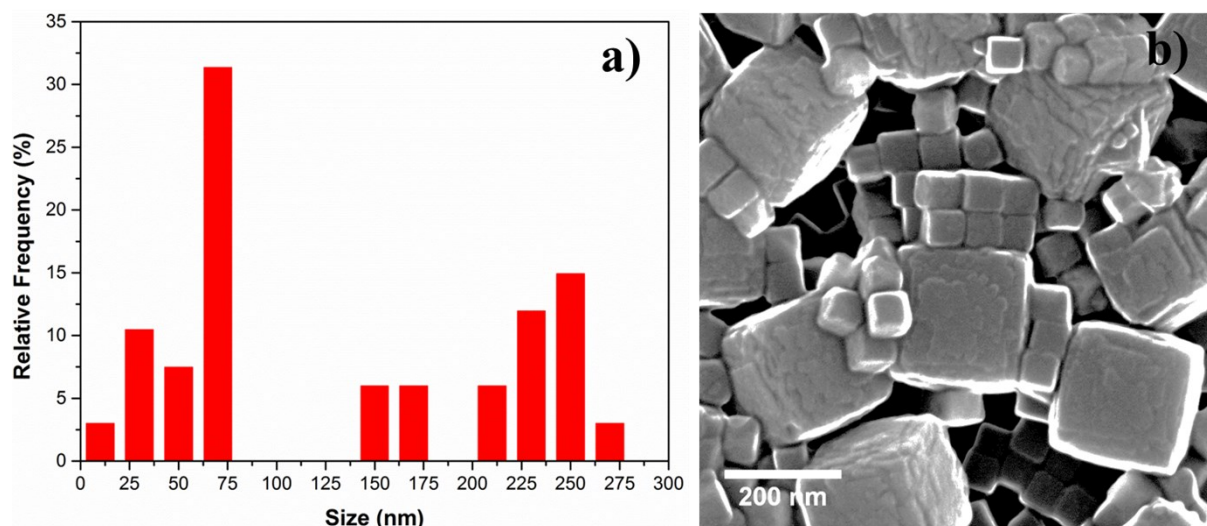

**Fig. S3** a) Histogram and b) SEM image show two different populations ( $\sim 72$  nm and  $\sim 240$  nm) of Fe<sub>3</sub>O<sub>4</sub> nanocubes grown at the heating rate of 1°C/min (SD $\sim$  18%, where SD refers to standard deviation)

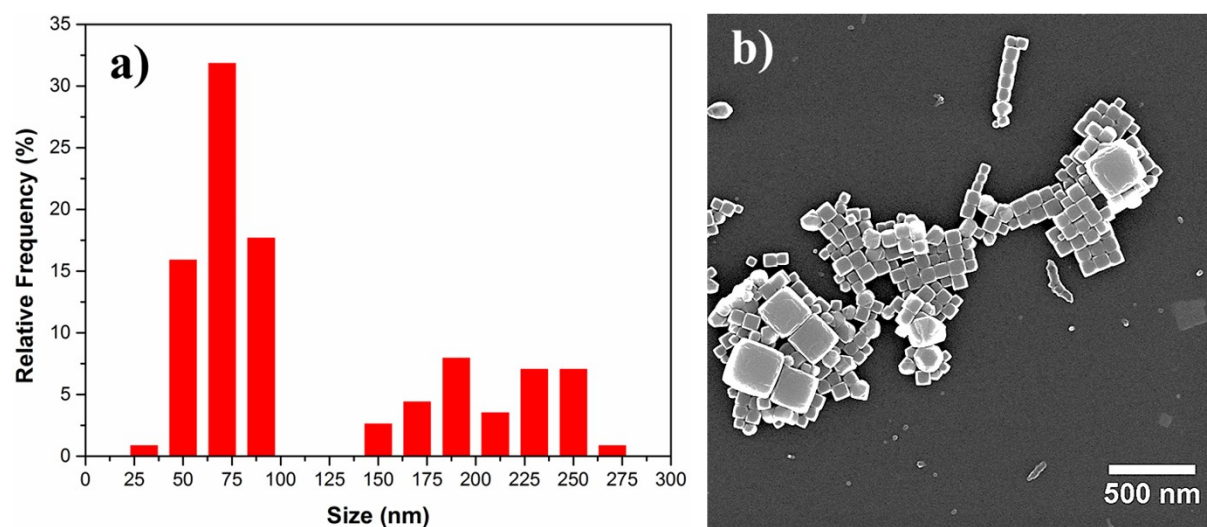

**Fig. S4** a) Histogram and b) SEM image show two different populations ( $\sim 70$  nm and  $\sim 220$  nm) of Fe<sub>3</sub>O<sub>4</sub> nanocubes grown at the heating rate of 2°C/min (SD $\sim$ 16%).

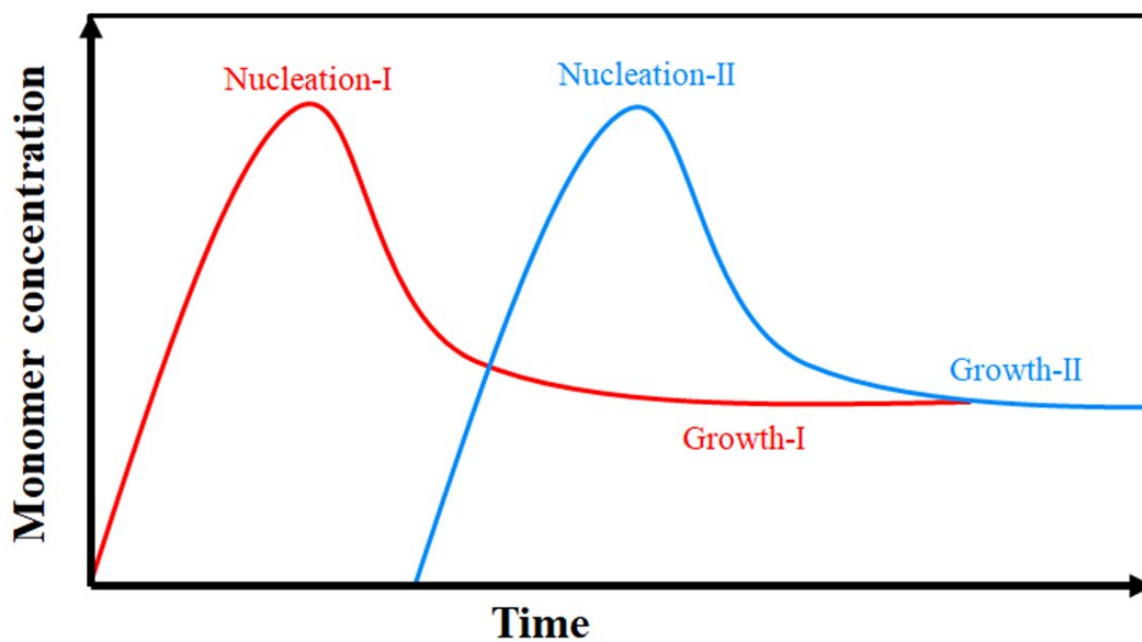

**Fig. S5** Multiple nucleation and growth events in the formation of  $\text{Fe}_3\text{O}_4$  nanocube at low heating rates ( $1^\circ\text{C}$  and  $2^\circ\text{C}$ ).



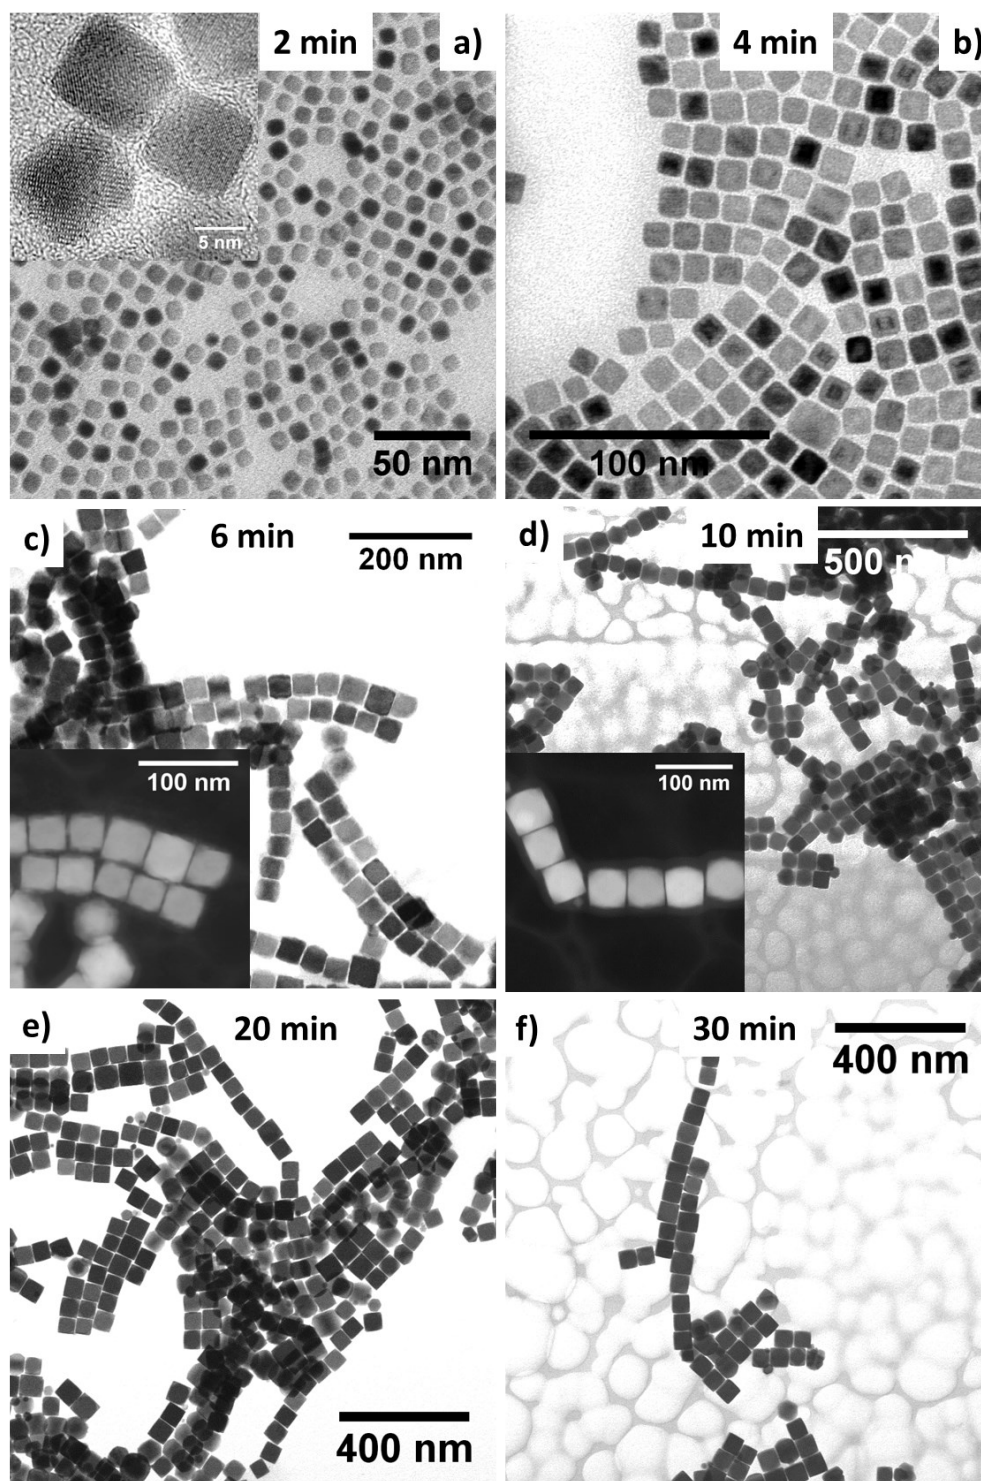

**Fig. S6** BF STEM images show the intermediate reaction products collected at different time intervals in growth of  $\text{Fe}_3\text{O}_4$  nanocubes at slow heating rate (5°C/min). Inset in panel (a) is HRTEM image. Insets in panels (c) and (d) are dark field STEM images.

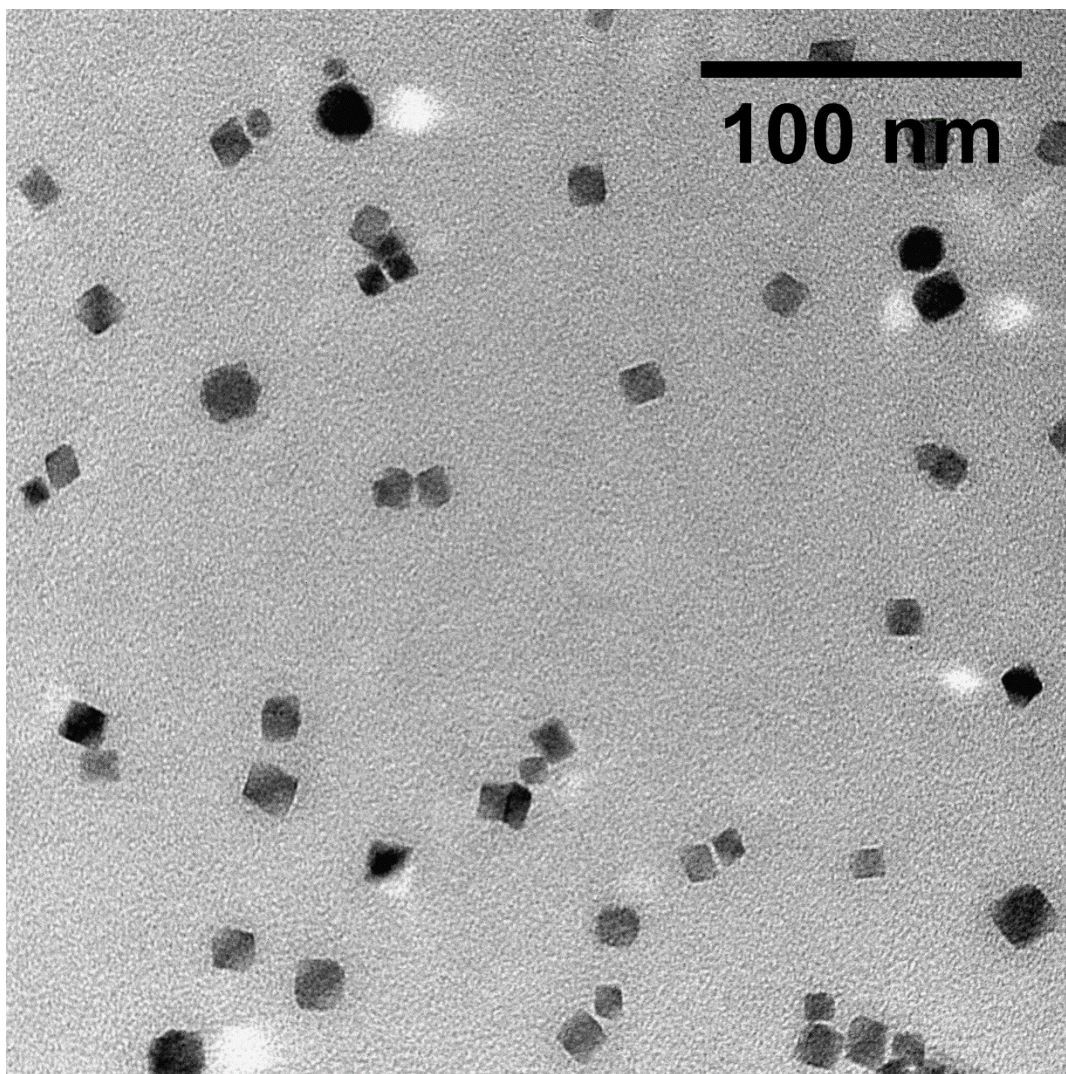

**Fig. S7** TEM image show the intermediate reaction product collected after 2 min during the growth of Fe<sub>3</sub>O<sub>4</sub> nanocubes at faster heating rate (10°C/min).



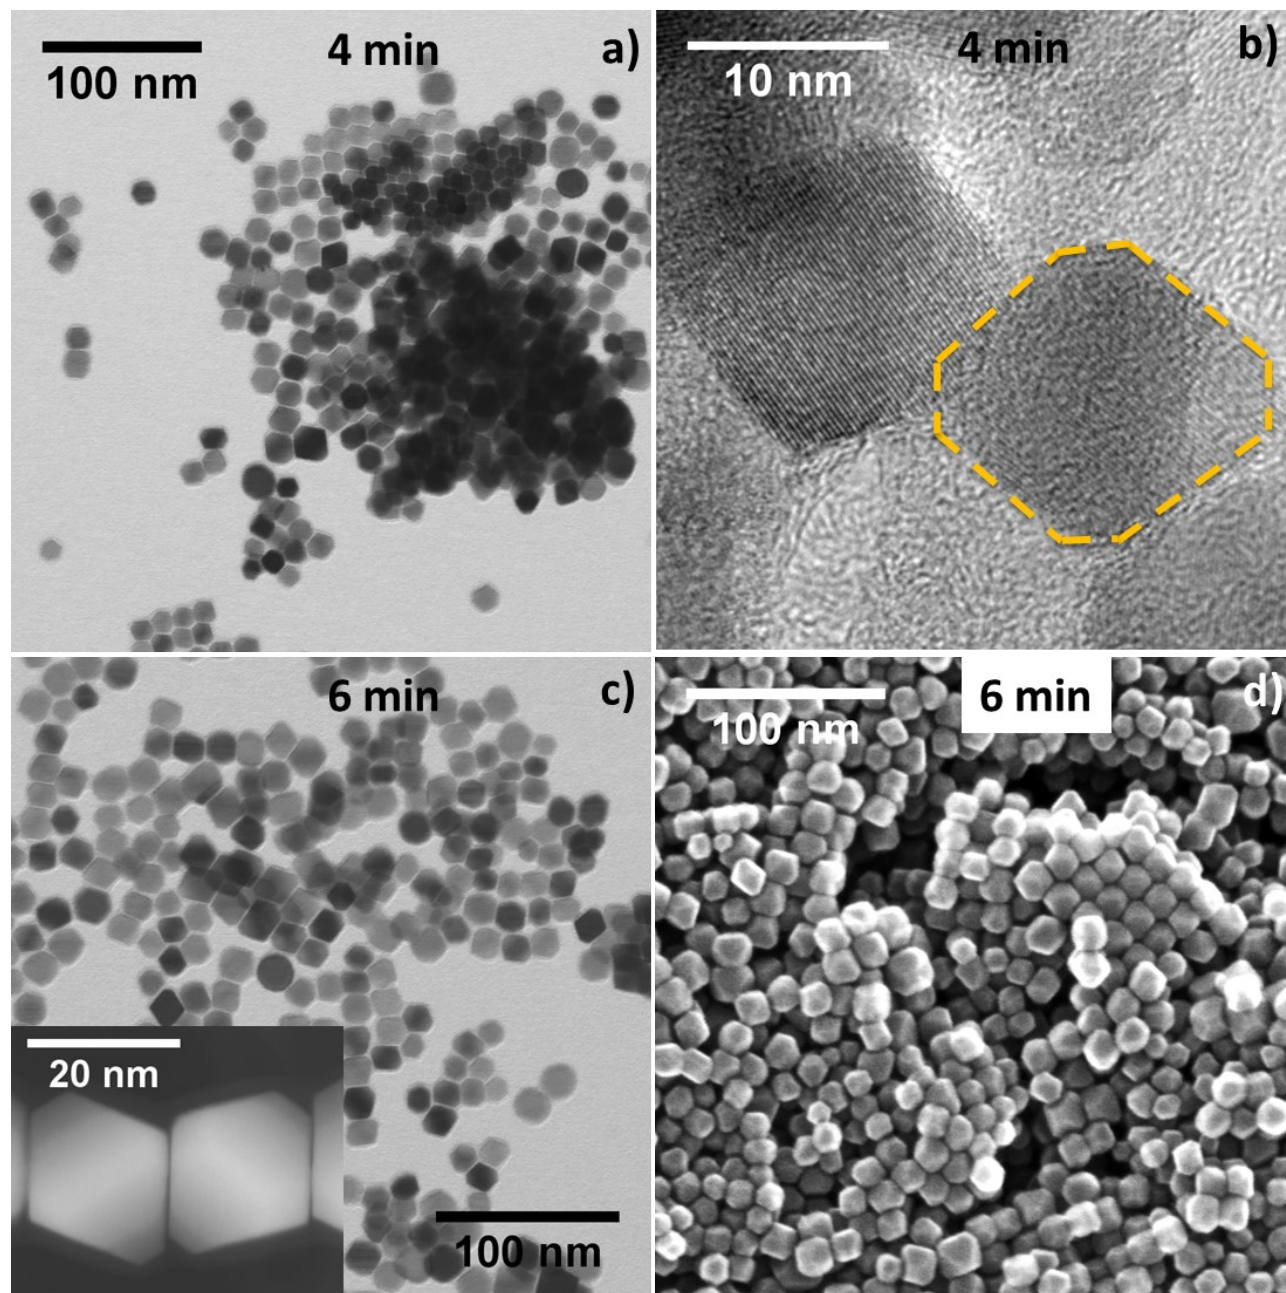

**Fig. S8** Intermediate reaction products during the growth of  $\text{Fe}_3\text{O}_4$  nanocubes at faster heating rate ( $10^\circ\text{C}/\text{min}$ ). a) BF STEM image of truncated octahedra after 2 min of the reaction. b) HRTEM image of NP shown in panel (a). c) BF STEM image of truncated octahedra NPs (inset is dark field STEM image) after 6 min of the reaction and d) SEM image.

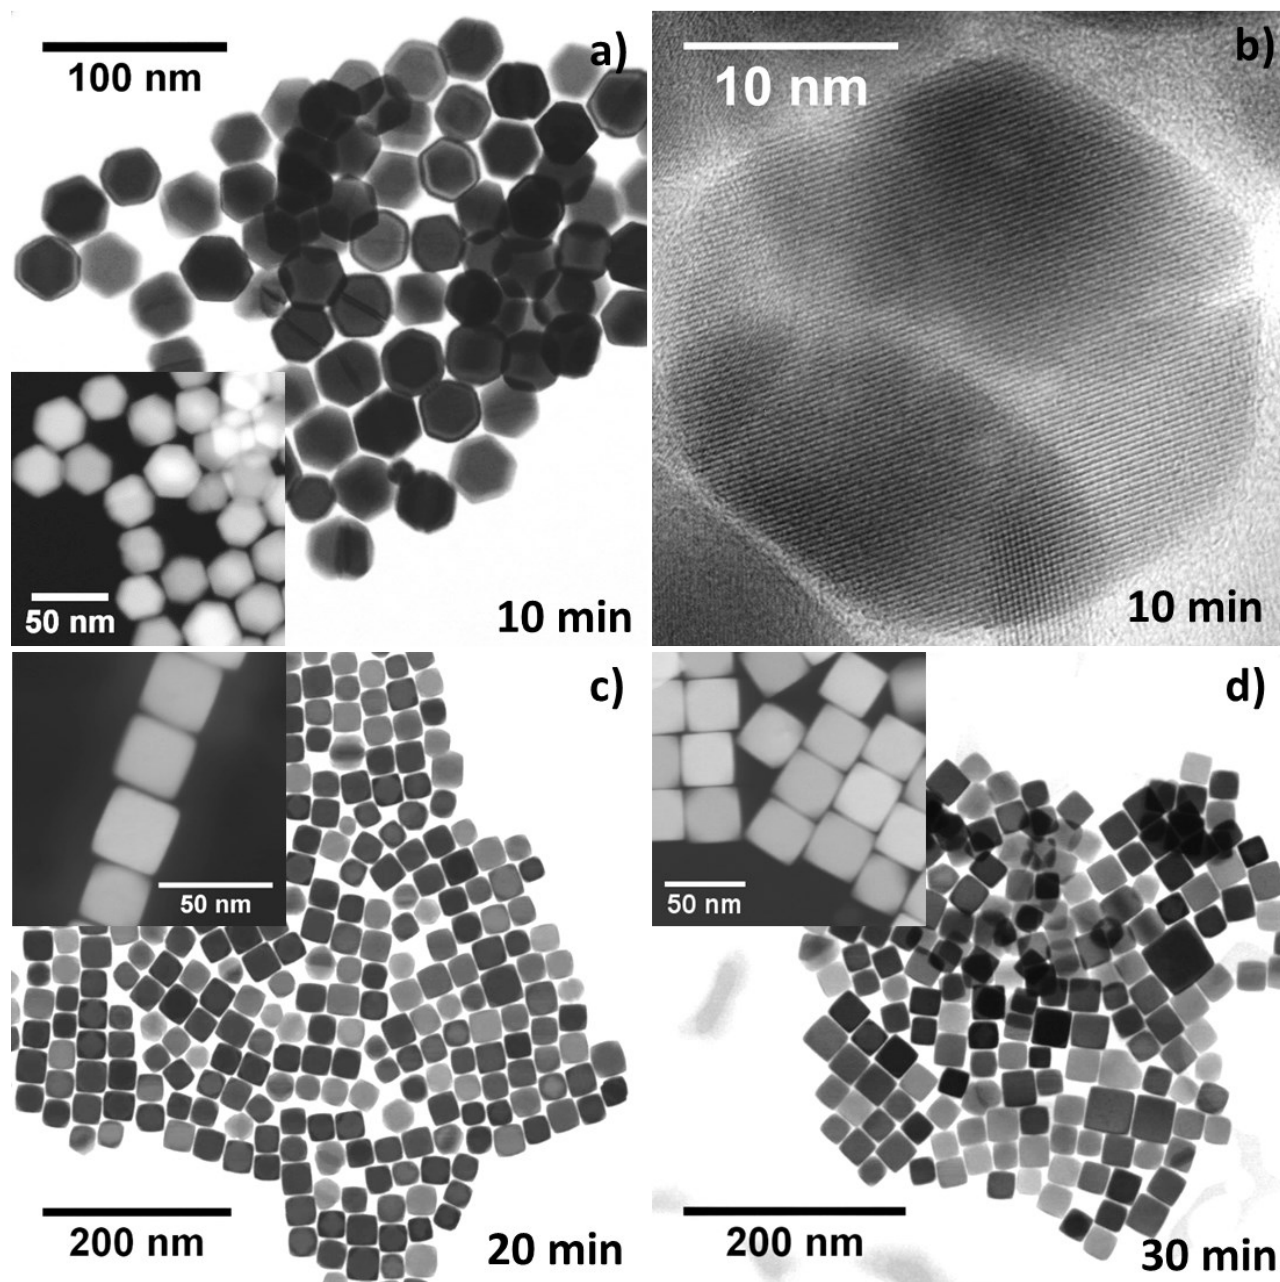

**Fig. S9** Intermediate reaction products during the growth of  $\text{Fe}_3\text{O}_4$  nanocubes at faster heating rate ( $10^\circ\text{C}/\text{min}$ ). a) BF STEM image of cuboctahedra after 10 min of the reaction. b) HRTEM image of NP shown in panel (a). c) BF STEM image of cubic NPs after 20 min of the reaction. d) c) BF STEM image of cubic NPs after 30 min of the reaction. Insets in panels (a), (c) and (d) are dark field STEM images.



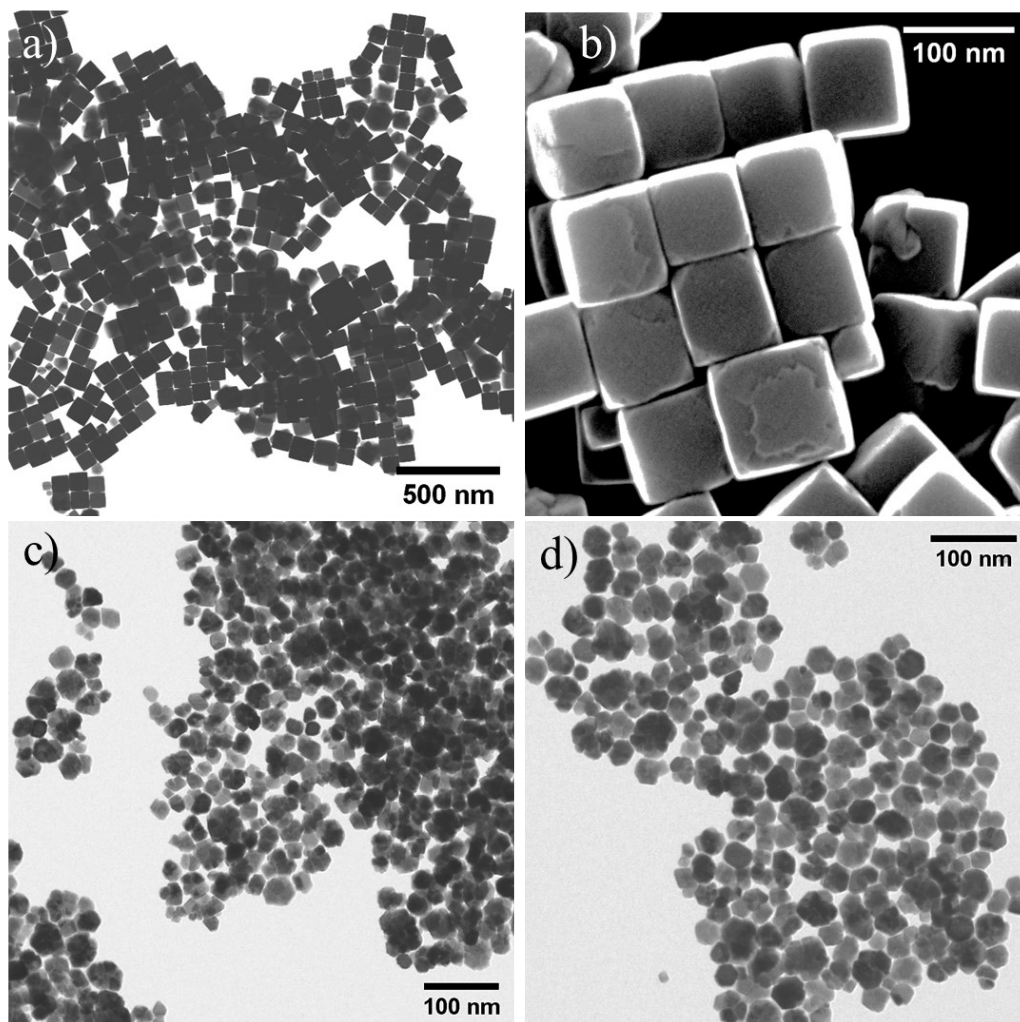

**Fig. S10** The influence of solvent on the shape of  $\text{Fe}_3\text{O}_4$  NPs; a) BF STEM and b) SEM image of nanocube of size  $\sim 86.3$  nm (SD $\sim 6\%$ ), solvent (BE) volume: 10 mL, c, d) BF STEM images of flower shaped (single or multiply twinned) NPs of size  $\sim 30.9$  nm (SD $\sim 10\%$ ), solvent (BE) volume: 50 mL.
